# Supplementary material
Source: publisher figshare collection journal article supplement (https://gsajournals.figshare.com/ndownloader/files/22172502)
Supplement: Supplementary file 1 [file 22172502]

## Sheet: bas02cycles1_2_12_avg_hap_freqs
Table S5. Mean haplotype frequencies genome-wide through one, two, and twelve rounds of outcrossing in 18F12v2.
Founder	18F1v2_frequency	18F2v2_frequency	18F12v2_frequency
AB1	0.08	0.032	0.012
AB2	0.044	0.013	0.005
AB3	0.176	0.332	0.414
AB4	0.09	0.033	0.033
A5	0.05	0.218	0.14
A6	0.105	0.064	0.143
A7	0.042	0.012	0.004
A8	0.043	0.022	0.007
A9	0.011	0.014	0.005
A11	0.035	0.028	0.012
A12	0.036	0.034	0.017
B5	0.091	0.084	0.113
B7	0.072	0.046	0.01
B8	0.023	0.014	0.057
B9	0.032	0.013	0.008
B11	0.031	0.026	0.013
B12	0.038	0.014	0.006
